# Supplementary material
Source: ML conference proceedings conference paper supplement (https://proceedings.mlr.press/v89/shen19a.html)
Supplement: Supplementary file 1 [file shen19a-supp.pdf]

## A Technical Lemmas

**Lemma 4** (Theorem 1.1 in [40]). *There exists a constant  $K$  such that, for any  $n, m$  any  $h \leq 2 \log \max\{m, n\}$  and any  $m \times n$  matrix  $A = (a_{ij})$  where  $a_{ij}$  are i.i.d. symmetric random variables, the following inequality holds:*

$$\max \left\{ \mathbb{E} \max_{1 \leq i \leq m} \|a_i\|_2^h, \mathbb{E} \max_{1 \leq j \leq n} \|a_j^h\|_2 \right\} \leq \mathbb{E} \|A\|^h \leq K \left( \mathbb{E} \max_{1 \leq i \leq m} \|a_i\|_2^h + \mathbb{E} \max_{1 \leq j \leq n} \|a_j^h\|_2 \right).$$

**Lemma 5** (Symmetrization, Lemma 6.3 in [30]). *Let  $F : \mathbb{R}_+ \rightarrow \mathbb{R}_+$  be convex. Then, for any finite sequence  $\{t_i\}$  of independent mean zero random variables in  $B$  such that for every  $i$   $\mathbb{E} [F(\|t_i\|_2)] < \infty$ , then*

$$\mathbb{E} \left[ F \left( \frac{1}{2} \left\| \sum \xi_i t_i \right\|_2 \right) \right] \leq \mathbb{E} \left[ F \left( \left\| \sum t_i \right\|_2 \right) \right] \leq \mathbb{E} \left[ F \left( 2 \left\| \sum \xi_i t_i \right\|_2 \right) \right],$$

where  $\{\xi_i\}$  are i.i.d. Rademacher random variables.

**Lemma 6** (Contraction, Theorem 4.12 in [30]). *Let  $F : \mathbb{R}_+ \rightarrow \mathbb{R}_+$  be convex and increasing. Let  $\psi_i : \mathbb{R} \rightarrow \mathbb{R}$  be contraction such that  $\psi_i(0) = 0$ . Then it holds that*

$$\mathbb{E} \left[ F \left( \frac{1}{2} \sup_{t_1, \dots, t_N} \left| \sum_{i=1}^N \xi_i \psi_i(t_i) \right| \right) \right] \leq \mathbb{E} \left[ F \left( \sup_{t_1, \dots, t_N} \left| \sum_{i=1}^N \xi_i t_i \right| \right) \right],$$

where  $\{\xi_i\}$  are i.i.d. Rademacher random variables.

**Lemma 7** (Lemma 2 in [17]). *Let  $f$  be a differentiable function and assume  $\max \left\{ \|M\|_\infty, \|\widehat{M}\|_\infty \right\} \leq \alpha$ . Then*

$$d_H^2 \left( f(M), f(\widehat{M}) \right) \geq \inf_{|x| \leq \alpha} \frac{(f'(x))^2}{8f(x)(1-f(x))} \frac{\|M - \widehat{M}\|_F^2}{d_1 d_2}.$$

**Lemma 8** (Lemma 4 in [17]). *Suppose that  $x, y \in (0, 1)$ . Then*

$$D(x|y) \leq \frac{(x-y)^2}{y(1-y)}.$$

**Lemma 9** (Lemma 3 in [17]). *Let  $\mathcal{K}$  be the set of matrices that satisfy (A2) and (A3). Let  $0 < \nu \leq 1$  be a scalar such that  $\nu^{-2}$  is an integer that is not larger than  $d_1$ . Then there exists a subset  $\mathcal{X} \subset \mathcal{K}$  with the following properties:*

1.  $|\mathcal{X}| \geq \exp \left( \frac{\nu d_2}{16\nu^2} \right)$ .
2.  $\forall X \in \mathcal{X}, |X_{ij}| = \alpha\nu$ .
3.  $\forall X, \tilde{X} \in \mathcal{X}$  with  $X \neq \tilde{X}$ ,  $\|X - \tilde{X}\|_F^2 > \frac{1}{2} \alpha^2 \nu^2 d_1 d_2$ .

## B Proof for Main Results

Recall the observation model:  $M \in \mathbb{R}^{d_1 \times d_2}$  is the true low-rank matrix and  $\Omega \subset [d_1] \times [d_2]$  is the index set of entries we observed.  $Y \in \mathbb{R}^{d_1 \times d_2}$  is the binary matrix determined by  $M$ : for all  $(i, j) \in \Omega$ ,

$$Y_{ij} = \begin{cases} +1, & \text{with probability } f(M_{ij}), \\ -1, & \text{with probability } 1 - f(M_{ij}). \end{cases}$$

In the setting of symmetric noise, the observation  $Y'_{ij} = \delta_{ij} Y_{ij}$  where  $\delta_{ij}$  are i.i.d. and

$$\delta_{ij} = \begin{cases} +1, & \text{with probability } 1 - \tau, \\ -1, & \text{with probability } \tau, \end{cases}$$

where  $\tau \in (0, 1/2)$  itself can be a random variable. Therefore, conditioning on  $\tau$ , we observe

$$\Pr(Y'_{ij} = 1 \mid \tau) = (1 - \tau)f(M_{ij}) + \tau(1 - f(M_{ij})).$$

**Case 1.** If  $\tau$  is a discrete random variable, say

$$\Pr(\tau = \tau_k) = p_k, \quad 1 \leq k \leq s,$$

then it is easy to see that

$$\begin{aligned} \Pr(Y'_{ij} = 1) &= \sum_{k=1}^s \Pr(Y'_{ij} = 1, \tau = \tau_k) \\ &= \sum_{k=1}^s \Pr(Y'_{ij} = 1 \mid \tau = \tau_k) \cdot \Pr(\tau = \tau_k) \\ &= \sum_{k=1}^s p_k \left[ (1 - \tau_k)f(M_{ij}) + \tau_k(1 - f(M_{ij})) \right]. \end{aligned}$$

Denote

$$g(x) = \sum_{k=1}^s p_k \left[ (1 - \tau_k)f(x) + \tau_k(1 - f(x)) \right] = (1 - 2\mathbb{E}[\tau])f(x) + \mathbb{E}[\tau].$$

We have

$$Y'_{ij} = \begin{cases} +1, & \text{with probability } g(M_{ij}), \\ -1, & \text{with probability } 1 - g(M_{ij}). \end{cases}$$

**Case 2.** If  $\tau$  is a continuous random variable with probability density function (pdf)  $h_\tau(t)$ , then we have

$$\begin{aligned} \Pr(Y'_{ij} = 1) &= \int_t h_{Y,\tau}(Y'_{ij} = 1, t) dt \\ &= \int_t h_{Y|\tau}(Y'_{ij} = 1 \mid t) h_\tau(t) dt \\ &= \int_t h_\tau(t) \left[ (1 - t)f(M_{ij}) + t(1 - f(M_{ij})) \right] dt, \end{aligned}$$

where  $h_{Y,\tau}(y, t)$  is the joint pdf of  $Y_{ij}$  and  $\tau$ , and  $h_{Y|\tau}(y \mid t)$  is the conditional pdf. Thus, define

$$g(x) = \int_t h_\tau(t) \left[ (1 - t)f(x) + t(1 - f(x)) \right] dt = (1 - 2\mathbb{E}[\tau])f(x) + \mathbb{E}[\tau].$$

We again have

$$Y'_{ij} = \begin{cases} +1, & \text{with probability } g(M_{ij}), \\ -1, & \text{with probability } 1 - g(M_{ij}). \end{cases}$$

Hence, the maximum likelihood estimator is given as follows:

$$\widehat{M} = \arg \max_X L_{\Omega, Y'}(X), \quad \text{s.t. } \|X\|_* \leq \alpha \sqrt{rd_1 d_2}, \quad \|X\|_\infty \leq \gamma,$$

where

$$L_{\Omega, Y'}(X) := \sum_{(i,j) \in \Omega} \left( \mathbf{1}_{\{Y_{ij}=1\}} \log g(X_{ij}) + \mathbf{1}_{\{Y_{ij}=-1\}} \log(1 - g(X_{ij})) \right).$$

For the sake of a principled analysis, we will treat  $g(x)$  as a general function at this point. Associated with the function  $g(x)$  are two quantities:

$$\rho_\gamma^+ := \sup_{|x| \leq \gamma} \frac{|g'(x)|}{g(x)(1-g(x))}, \quad \rho_\gamma^- := \sup_{|x| \leq \gamma} \frac{g(x)(1-g(x))}{(g'(x))^2}.$$

We will use several kinds of distances in the proof. The first one is Hellinger distance that is given by

$$d_H^2(p, q) := (\sqrt{p} - \sqrt{q})^2 + (\sqrt{1-p} + \sqrt{1-q})^2, \quad \forall 0 \leq p, q \leq 1.$$

Extending it to the matrix, we write

$$d_H^2(P, Q) := \frac{1}{d_1 d_2} \sum_{i,j} d_H^2(P_{ij}, Q_{ij}),$$

where  $P, Q \in \mathbb{R}^{d_1 \times d_2}$  and the entries therein are between 0 and 1.

For two probability distributions  $\mathcal{P}$  and  $\mathcal{Q}$  on a finite set  $A$ , the Kullback-Leibler (KL) divergence is defined as

$$D(\mathcal{P}||\mathcal{Q}) = \sum_{x \in A} \mathcal{P}(x) \log \frac{\mathcal{P}(x)}{\mathcal{Q}(x)}.$$

With a slight abuse, we write for two scalars  $p, q \in [0, 1]$

$$D(p||q) = p \log \frac{p}{q} + (1-p) \log \frac{1-p}{1-q},$$

and for two matrices  $P, Q \in [0, 1]^{d_1 \times d_2}$ ,

$$D(P||Q) = \frac{1}{d_1 d_2} \sum_{i,j} D(P_{ij}||Q_{ij}).$$

Throughout the proof, we will work with a shifted MLE, i.e.

$$\begin{aligned} \bar{L}_{\Omega, Y'}(X) &:= L_{\Omega, Y'}(X) - L_{\Omega, Y'}(0) = \sum_{(i,j) \in \Omega} \left( \mathbf{1}_{\{Y_{ij}=1\}} \log \frac{g(X_{ij})}{g(0)} + \mathbf{1}_{\{Y_{ij}=-1\}} \log \frac{1-g(X_{ij})}{1-g(0)} \right) \\ &= \sum_{i,j} \mathbf{1}_{\{(i,j) \in \Omega\}} \left( \mathbf{1}_{\{Y_{ij}=1\}} \log \frac{g(X_{ij})}{g(0)} + \mathbf{1}_{\{Y_{ij}=-1\}} \log \frac{1-g(X_{ij})}{1-g(0)} \right). \end{aligned} \quad (12)$$

### B.1 Proof for Lemma 3

*Proof.* Using the Markov's inequality, we have for any  $\theta > 0$ ,

$$\begin{aligned} \Pr \left( \sup_{X \in \mathcal{S}} |\bar{L}_{\Omega, Y'}(X) - \mathbb{E} \bar{L}_{\Omega, Y'}(X)| \geq C_0 \alpha \rho_\gamma^+ \sqrt{r} \sqrt{n(d_1 + d_2) + d_1 d_2 \log(d_1 d_2)} \right) \\ \leq \frac{\mathbb{E} \left[ \sup_{X \in \mathcal{S}} |\bar{L}_{\Omega, Y'}(X) - \mathbb{E} \bar{L}_{\Omega, Y'}(X)|^\theta \right]}{\left( C_0 \alpha \rho_\gamma^+ \sqrt{r} \sqrt{n(d_1 + d_2) + d_1 d_2 \log(d_1 d_2)} \right)^\theta}. \end{aligned} \quad (13)$$

We bound the numerator above. Recall that

$$\bar{L}_{\Omega, Y'}(X) = \sum_{i,j} \mathbf{1}_{\{(i,j) \in \Omega\}} \left( \mathbf{1}_{\{Y'_{ij}=1\}} \log \frac{g(X_{ij})}{g(0)} + \mathbf{1}_{\{Y'_{ij}=-1\}} \log \frac{1-g(X_{ij})}{1-g(0)} \right).$$

Let the random variable

$$\tilde{t}_{ij} = \mathbf{1}_{\{(i,j) \in \Omega\}} \left( \mathbf{1}_{\{Y'_{ij}=1\}} \log \frac{g(X_{ij})}{g(0)} + \mathbf{1}_{\{Y'_{ij}=-1\}} \log \frac{1-g(X_{ij})}{1-g(0)} \right),$$

and let

$$t_{ij} = \tilde{t}_{ij} - \mathbb{E} \tilde{t}_{ij}.$$

Then

$$\bar{L}_{\Omega, Y'}(X) - \mathbb{E} \bar{L}_{\Omega, Y'}(X) = \sum_{i,j} t_{ij}.$$

Note that  $\{t_{ij}\}$  are i.i.d. random variables with zero mean. The function  $F(t) = \sup t^\theta$  is convex for  $\theta \geq 1$ , and  $\mathbb{E} F(|t_{ij}|)$  is finite for all  $(i, j) \in [d_1] \times [d_2]$ . Hence, we can apply Lemma 5 to obtain

$$\begin{aligned} & \mathbb{E} \left[ \sup_{X \in \mathcal{S}} |\bar{L}_{\Omega, Y'}(X) - \mathbb{E} \bar{L}_{\Omega, Y'}(X)|^\theta \right] \\ & \leq 2^\theta \mathbb{E} \left[ \sup_{X \in \mathcal{S}} \left| \sum_{i,j} \xi_{ij} \mathbf{1}_{\{(i,j) \in \Omega\}} \left( \mathbf{1}_{\{Y'_{ij}=1\}} \log \frac{g(X_{ij})}{g(0)} + \mathbf{1}_{\{Y'_{ij}=-1\}} \log \frac{1-g(X_{ij})}{1-g(0)} \right) \right|^\theta \right], \end{aligned}$$

where  $\{\xi_{ij}\}$  are i.i.d. Rademacher random variables. Now observe that due to the construction of  $\rho_\gamma^+$ , both  $\frac{1}{\rho_\gamma^+} \log \frac{g(x)}{g(0)}$  and  $\frac{1}{\rho_\gamma^+} \log \frac{1-g(x)}{1-g(0)}$  are contractions and vanish at  $x = 0$ . Thereby, using Lemma 6 we have

$$\begin{aligned} & \mathbb{E} \left[ \sup_{X \in \mathcal{S}} |\bar{L}_{\Omega, Y'}(X) - \mathbb{E} \bar{L}_{\Omega, Y'}(X)|^\theta \right] \\ & \leq (4\rho_\gamma^+)^{\theta} \mathbb{E} \left[ \sup_{X \in \mathcal{S}} \left| \sum_{i,j} \xi_{ij} \mathbf{1}_{\{(i,j) \in \Omega\}} \left( \mathbf{1}_{\{Y'_{ij}=1\}} X_{ij} - \mathbf{1}_{\{Y'_{ij}=-1\}} X_{ij} \right) \right|^\theta \right] \\ & = (4\rho_\gamma^+)^{\theta} \mathbb{E} \left[ \sup_{X \in \mathcal{S}} \left| \sum_{i,j} \xi_{ij} \mathbf{1}_{\{(i,j) \in \Omega\}} Y'_{ij} X_{ij} \right|^\theta \right]. \end{aligned}$$

With a simple algebra, we have

$$\Pr(\xi_{ij} Y'_{ij} = 1) = \Pr(\xi_{ij} = 1, Y'_{ij} = 1) + \Pr(\xi_{ij} = -1, Y'_{ij} = -1) = \frac{1}{2} (\Pr(Y'_{ij} = 1) + \Pr(Y'_{ij} = -1)) = \frac{1}{2},$$

which implies that the distribution of  $\xi_{ij} Y'_{ij}$  is the same as that of  $\xi_{ij}$  for all  $(i, j) \in [d_1] \times [d_2]$ . Thus, by denoting  $\Delta_\Omega$  the matrix such that its  $(i, j)$ -th element is 1 if  $(i, j) \in \Omega$  and 0 otherwise, and  $\Xi = (\xi_{ij})$ , it follows that

$$\begin{aligned} \mathbb{E} \left[ \sup_{X \in \mathcal{S}} |\bar{L}_{\Omega, Y'}(X) - \mathbb{E} \bar{L}_{\Omega, Y'}(X)|^\theta \right] & \leq (4\rho_\gamma^+)^{\theta} \mathbb{E} \left[ \sup_{X \in \mathcal{S}} \left| \sum_{i,j} \xi_{ij} \mathbf{1}_{\{(i,j) \in \Omega\}} X_{ij} \right|^\theta \right] \\ & = (4\rho_\gamma^+)^{\theta} \mathbb{E} \left[ \sup_{X \in \mathcal{S}} |\langle \Delta_\Omega \circ \Xi, X \rangle|^\theta \right] \\ & \leq (4\rho_\gamma^+)^{\theta} \mathbb{E} \left[ \sup_{X \in \mathcal{S}} \|\Delta_\Omega \circ \Xi\|^\theta \|X\|_*^\theta \right] \\ & \leq (\alpha \sqrt{rd_1 d_2})^\theta \mathbb{E} \left[ \|\Delta_\Omega \circ \Xi\|^\theta \right]. \end{aligned} \tag{14}$$

Above, the last inequality follows from the nuclear norm constraint we imposed in the MLE estimator. Note that the  $(i, j)$ -th entry of the matrix  $\Delta_\Omega \circ \Xi$  is given by  $\mathbf{1}_{\{(i,j) \in \Omega\}} \xi_{ij}$ , which are i.i.d. symmetric random variables. Thus, Lemma 4 implies that

$$\begin{aligned} \mathbb{E} \left[ \|\Delta_\Omega \circ \Xi\|^\theta \right] & \leq C \left( \mathbb{E} \max_{1 \leq i \leq d_1} \left( \sum_{j=1}^{d_2} (\xi_{ij} \Delta_{ij})^2 \right)^{\theta/2} + \mathbb{E} \max_{1 \leq j \leq d_2} \left( \sum_{i=1}^{d_1} (\xi_{ij} \Delta_{ij})^2 \right)^{\theta/2} \right) \\ & = C \left( \mathbb{E} \max_{1 \leq i \leq d_1} \left( \sum_{j=1}^{d_2} \Delta_{ij} \right)^{\theta/2} + \mathbb{E} \max_{1 \leq j \leq d_2} \left( \sum_{i=1}^{d_1} \Delta_{ij} \right)^{\theta/2} \right). \end{aligned} \tag{15}$$

Fix  $i$ . By Bernstein's inequality, for all  $t > 0$ ,

$$\Pr \left( \left| \sum_{j=1}^{d_2} \left( \Delta_{ij} - \frac{n}{d_1 d_2} \right) \right| > t \right) \leq 2 \exp \left( \frac{-t^2/2}{n/d_1 + t/3} \right).$$

When  $t \geq \frac{6n}{d_1}$ , the above reduces to

$$\Pr \left( \left| \sum_{j=1}^{d_2} \left( \Delta_{ij} - \frac{n}{d_1 d_2} \right) \right| > t \right) \leq 2 \exp(-t).$$

Suppose that  $W_1, \dots, W_{d_1}$  are i.i.d. exponential random variables with pdf  $\exp(-t)$ . Then it follows that

$$\Pr \left( \left| \sum_{j=1}^{d_2} \left( \Delta_{ij} - \frac{n}{d_1 d_2} \right) \right| > t \right) \leq 2 \Pr(W_i \geq t).$$

On the other hand, we have

$$\begin{aligned} \left( \mathbb{E} \max_{1 \leq i \leq d_1} \left( \sum_{j=1}^{d_2} \Delta_{ij} \right)^{\theta/2} \right)^{1/\theta} &\leq \sqrt{\frac{n}{d_1}} + \left( \mathbb{E} \max_{1 \leq i \leq d_1} \left| \sum_{j=1}^{d_2} \left( \Delta_{ij} - \frac{n}{d_1 d_2} \right) \right|^{\theta/2} \right)^{1/\theta} \\ &\stackrel{\zeta_1}{=} \sqrt{\frac{n}{d_1}} + \left( \int_0^{+\infty} \Pr \left( \max_{1 \leq i \leq d_1} \left| \sum_{j=1}^{d_2} \left( \Delta_{ij} - \frac{n}{d_1 d_2} \right) \right|^{\theta/2} \geq t \right) dt \right)^{1/\theta} \\ &\leq \sqrt{\frac{n}{d_1}} + \left( \left( \frac{6n}{d_1} \right)^{\theta/2} + \int_{(6n/d_1)^{\theta/2}}^{+\infty} \Pr \left( \max_{1 \leq i \leq d_1} \left| \sum_{j=1}^{d_2} \left( \Delta_{ij} - \frac{n}{d_1 d_2} \right) \right|^{\theta/2} \geq t \right) dt \right)^{1/\theta} \\ &\leq \sqrt{\frac{n}{d_1}} + \left( \left( \frac{6n}{d_1} \right)^{\theta/2} + 2 \int_{(6n/d_1)^{\theta/2}}^{+\infty} \Pr \left( \max_{1 \leq i \leq d_1} W_i^{\theta/2} \geq t \right) dt \right)^{1/\theta} \\ &\stackrel{\zeta_2}{\leq} \sqrt{\frac{n}{d_1}} + \left( \left( \frac{6n}{d_1} \right)^{\theta/2} + 2 \mathbb{E} \max_{1 \leq i \leq d_1} W_i^{\theta/2} \right)^{1/\theta} \\ &\leq (1 + \sqrt{6}) \sqrt{\frac{n}{d_1}} + 2^{1/\theta} \left( \mathbb{E} \max_{1 \leq i \leq d_1} W_i^{\theta/2} \right)^{1/\theta}. \end{aligned}$$

Here,  $\zeta_1$  and  $\zeta_2$  use the identity  $\mathbb{E} x = \int_0^{+\infty} \Pr(x \geq t) dt$  for any positive random variable  $x$ . It remains to bound  $\mathbb{E} \max_{1 \leq i \leq d_1} W_i^{\theta/2}$ . Using the fact that  $W_i$  is exponential, we have

$$\mathbb{E} \max_{1 \leq i \leq d_1} W_i^{\theta/2} \leq \left| \max_{1 \leq i \leq d_1} W_i - \log d_1 \right|^{\theta/2} + \log^{\theta/2} d_1 \leq 2((\theta/2)!) + \log^{\theta/2} d_1 \leq 2(\theta/2)^{\theta/2} + \log^{\theta/2} d_1,$$

where we apply Stirling's approximation in the last inequality. Thus,

$$2^{1/\theta} \left( \mathbb{E} \max_{1 \leq i \leq d_1} W_i^{\theta/2} \right)^{1/\theta} \leq 2^{1/\theta} \left( \sqrt{\log d_1} + 2^{1/\theta} \sqrt{\theta/2} \right).$$

Picking  $\theta = 2 \log(d_1 + d_2)$  gives

$$2^{1/\theta} \left( \mathbb{E} \max_{1 \leq i \leq d_1} W_i^{\theta/2} \right)^{1/\theta} \leq (2 + \sqrt{2}) \sqrt{\log(d_1 + d_2)}.$$

Putting pieces together, we obtain

$$\left( \mathbb{E} \max_{1 \leq i \leq d_1} \left( \sum_{j=1}^{d_2} \Delta_{ij} \right)^{\theta/2} \right)^{1/\theta} \leq (1 + \sqrt{6}) \sqrt{\frac{n}{d_1}} + (2 + \sqrt{2}) \sqrt{\log(d_1 + d_2)}.$$

Likewise, we can show that

$$\left( \mathbb{E} \max_{1 \leq j \leq d_2} \left( \sum_{i=1}^{d_1} \Delta_{ij} \right)^{\theta/2} \right)^{1/\theta} \leq (1 + \sqrt{6}) \sqrt{\frac{n}{d_2}} + (2 + \sqrt{2}) \sqrt{\log(d_1 + d_2)}.$$

Note that  $\sqrt{x}$  is a concave function. Hence, Jensen's inequality implies that (15) can be bounded as follows:

$$\begin{aligned} \left( \mathbb{E} \left[ \|\Delta_\Omega \circ \Xi\|^\theta \right] \right)^{1/\theta} &\leq C^{1/\theta} \left( (1 + \sqrt{6}) \sqrt{\frac{2n(d_1 + d_2)}{d_1 d_2}} + (2 + \sqrt{2}) \sqrt{\log(d_1 + d_2)} \right) \\ &\leq C^{1/\theta} 2(1 + \sqrt{6}) \sqrt{\frac{n(d_1 + d_2) + d_1 d_2 \log(d_1 + d_2)}{d_1 d_2}}. \end{aligned}$$

Plugging this back to (14), we have

$$\left( \mathbb{E} \left[ \sup_{X \in \mathcal{S}} |\bar{L}_{\Omega, Y'}(X) - \mathbb{E} \bar{L}_{\Omega, Y'}(X)|^\theta \right] \right)^{1/\theta} \leq C^{1/\theta} 8(1 + \sqrt{6}) \alpha \rho_\gamma^+ \sqrt{r} \sqrt{n(d_1 + d_2) + d_1 d_2 \log(d_1 + d_2)}.$$

Therefore, (13) is upper bounded by

$$C \left( \frac{8(1 + \sqrt{6})}{C_0} \right)^{2 \log(d_1 + d_2)} \leq \frac{C}{d_1 + d_2},$$

as soon as we choose  $C_0 \geq 8(1 + \sqrt{6})\sqrt{e}$ . □

## B.2 Proof for Theorem 1

We need the following result in our proof.

**Proposition 10.** *Assume same conditions as in Theorem 1 but with a slightly more general assumption that  $\|M\|_\infty \leq \gamma$  in place of  $\|M\|_\infty \leq \alpha$ . Then, with probability at least  $1 - C_1/(d_1 + d_2)$ , the follows holds:*

$$d_H^2(g(\widehat{M}), g(M)) \leq C_2 \rho_\gamma^+ \alpha \sqrt{\frac{r(d_1 + d_2)}{n}} \sqrt{1 + \frac{(d_1 + d_2) \log(d_1 d_2)}{n}},$$

where  $C_1$  and  $C_2$  are absolute constants.

*Proof.* For any matrix  $X \in \mathbb{R}^{d_1 \times d_2}$ , we have

$$\begin{aligned} \mathbb{E} [\bar{L}_{\Omega, Y'}(X) - \bar{L}_{\Omega, Y'}(M)] &= \mathbb{E} [L_{\Omega, Y'}(X) - L_{\Omega, Y'}(M)] \\ &= \mathbb{E} \left[ \sum_{i,j} \mathbf{1}_{\{(i,j) \in \Omega\}} \left( \mathbf{1}_{\{Y'_{ij}=1\}} \log \frac{g(X_{ij})}{g(M_{ij})} + \mathbf{1}_{\{Y'_{ij}=-1\}} \log \frac{1-g(X_{ij})}{1-g(M_{ij})} \right) \right] \\ &= \mathbb{E} \left[ \sum_{i,j} \frac{n}{d_1 d_2} \left( g(M_{ij}) \log \frac{g(X_{ij})}{g(M_{ij})} + (1-g(M_{ij})) \log \frac{1-g(X_{ij})}{1-g(M_{ij})} \right) \right] \\ &= -nD(g(M)||g(X)). \end{aligned} \tag{16}$$

On the other hand, for the optimum  $\widehat{M}$ , it holds that

$$\begin{aligned} \bar{L}_{\Omega, Y'}(\widehat{M}) - \bar{L}_{\Omega, Y'}(M) &= \mathbb{E} [\bar{L}_{\Omega, Y'}(\widehat{M}) - \bar{L}_{\Omega, Y'}(M)] + \left( \bar{L}_{\Omega, Y'}(\widehat{M}) - \mathbb{E} [\bar{L}_{\Omega, Y'}(\widehat{M})] \right) \\ &\quad + \left( \mathbb{E} [\bar{L}_{\Omega, Y'}(M)] - \bar{L}_{\Omega, Y'}(M) \right) \\ &\leq \mathbb{E} [\bar{L}_{\Omega, Y'}(X) - \bar{L}_{\Omega, Y'}(M)] + 2 \sup_{X \in \mathcal{S}} |\bar{L}_{\Omega, Y'}(X) - \mathbb{E} [\bar{L}_{\Omega, Y'}(X)]|, \end{aligned}$$

where we recall that  $\mathcal{S}$  was defined in Lemma 3. Since  $\widehat{M}$  also maximizes  $\bar{L}_{\Omega, Y'}(X)$ , we obtain

$$-\mathbb{E} [\bar{L}_{\Omega, Y'}(X) - \bar{L}_{\Omega, Y'}(M)] \leq 2 \sup_{X \in \mathcal{S}} |\bar{L}_{\Omega, Y'}(X) - \mathbb{E} [\bar{L}_{\Omega, Y'}(X)]|.$$

This together with (16) and Lemma 3 imply that

$$D(g(M) \| g(\widehat{M})) \leq 2C_0\alpha_0\rho_\gamma^+ \sqrt{\frac{r(d_1 + d_2)}{n}} \sqrt{1 + \frac{(d_1 + d_2) \log(d_1 d_2)}{n}}$$

holds with probability at least  $1 - C_1/(d_1 + d_2)$ . Since the Hellinger distance is upper bounded by the KL divergence, we complete the proof.  $\square$

Now we are in the position to prove Theorem 1. In fact, Theorem 1 follows immediately from Prop. 10 and Lemma 7.

### B.3 Proof for Theorem 2

*Proof.* Without loss of generality, suppose that  $d_1 \leq d_2$ . Let

$$\epsilon^2 = \min \left\{ \frac{1}{1024}, C\alpha \sqrt{\frac{\rho_{0.75\alpha}^- r d_2}{n}} \right\}.$$

Pick

$$\frac{4\sqrt{2}\epsilon}{\alpha} \leq \nu \leq \frac{8\epsilon}{\alpha}.$$

It is easy to see that

$$\frac{r\alpha^2}{64\epsilon^2} \leq \frac{r}{\nu^2} \leq \frac{r\alpha^2}{32\epsilon^2}.$$

The length of this interval is  $\frac{r\alpha^2}{64\epsilon^2}$ , which is larger than 1 since  $\alpha \geq 1$ ,  $r \geq 16$  and  $\epsilon^2 \leq 1/1024$ . Hence, it is possible to pick a proper  $\nu$  such that  $\frac{r}{\nu^2}$  is an integer. Also, the assumption that  $\epsilon^2 \geq O(r\alpha^2/d_1)$  suggests  $r/\nu^2 \leq d_1$ . Hence we have found an appropriate  $\nu$  for Lemma 9.

Let  $\mathcal{X}'_{\alpha/2, \nu}$  be a set that satisfies all the properties in Lemma 9 with parameter  $\alpha/2$ . Let

$$\mathcal{X} = \left\{ X' + \alpha \left( 1 - \frac{\nu}{2} \right) U : X' \in \mathcal{X}'_{\alpha/2, \nu} \right\},$$

where all the entries of  $U$  equal one.

First, we verify that each component in  $\mathcal{X}$  satisfies (A2) and (A3). It is easy to see that for any  $X \in \mathcal{X}$ ,  $|X_{ij}|$  either equals  $\alpha$  or  $(1 - \nu)\alpha$ , i.e.,  $\|X\|_\infty \leq \alpha$  since  $\nu < 1$ . In addition,

$$\left\| X' + \alpha \left( 1 - \frac{\nu}{2} \right) U \right\|_* \leq \|X'\|_* + \alpha \left( 1 - \frac{\nu}{2} \right) \|U\|_* \leq \frac{\alpha}{2} \sqrt{rd_1 d_2} + \alpha \left( 1 - \frac{\nu}{2} \right) \|U\|_F.$$

Since  $\nu \in (0, 1)$  and  $r \geq 16$ , we have  $2 - \nu \leq \sqrt{r}$ , which together with  $\|U\|_F = \sqrt{d_1 d_2}$  imply that  $\|X\|_* \leq \alpha \sqrt{rd_1 d_2}$  for all  $X \in \mathcal{X}$ .

We prove the theorem by showing that its converse is false. That is, suppose that there exists an algorithm such that for any  $M \in \mathcal{X}$  (which satisfies (A2) and (A3)), with probability at least  $1/4$ , its output  $\widehat{X}$  satisfies

$$\frac{1}{d_1 d_2} \left\| \widehat{X} - M \right\|_F^2 < \epsilon^2. \quad (17)$$

Let  $X^* \in \mathcal{X}$  be the closest member to  $\widehat{X}$ . For any  $\widetilde{X} \neq M \in \mathcal{X}$ , it follows that

$$\left\| \widetilde{X} - \widehat{X} \right\|_F \geq \left\| \widetilde{X} - M \right\|_F - \left\| \widehat{X} - M \right\|_F > 2\epsilon\sqrt{d_1 d_2} - \epsilon\sqrt{d_1 d_2} = \epsilon\sqrt{d_1 d_2}, \quad (18)$$

where the last inequality follows from (17) and the fact that for any  $X, \widetilde{X} \in \mathcal{X}$ ,

$$\left\| X - \widetilde{X} \right\|_F^2 \geq \frac{\alpha^2 \nu^2 d_1 d_2}{8} \geq 4d_1 d_2 \epsilon^2.$$

The first inequality above uses the third property in Lemma 9 and the second inequality follows from our choice of  $\nu$ .

On the other hand, since  $X^*$  is the closest one to  $\widehat{X}$ , we have

$$\left\| X^* - \widehat{X} \right\|_F \leq \left\| M - \widehat{X} \right\|_F \leq \epsilon\sqrt{d_1 d_2}. \quad (19)$$

Combining (18) and (19), we obtain

$$\left\| X^* - \widehat{X} \right\|_F < \left\| \widetilde{X} - \widehat{X} \right\|_F, \quad \forall \widetilde{X} \neq M,$$

which implies  $X^* = M$ . Since (17) holds with probability at least  $1/4$ ,

$$\Pr(X^* \neq M) \leq \frac{3}{4}. \quad (20)$$

From a variant of Fano's inequality,

$$\Pr(X^* \neq M) \geq 1 - \frac{1 + d_1 d_2 \max_{X \neq \widetilde{X}} D(Y'_\Omega | X \parallel Y'_\Omega | \widetilde{X})}{\log |\mathcal{X}|} \quad (21)$$

Denote

$$D = d_1 d_2 D(Y'_\Omega | X \parallel Y'_\Omega | \widetilde{X}) = \sum_{(i,j) \in \Omega} D(Y'_{ij} | X_{ij} \parallel Y'_{ij} | \widetilde{X}_{ij}).$$

For each  $(i, j) \in \Omega$ ,  $D(Y'_{ij} | X_{ij} \parallel Y'_{ij} | \widetilde{X}_{ij})$  is either 0,  $D(g(\alpha) \| g(\alpha'))$  or  $D(g(\alpha) \| g(\alpha'))$ , where  $\alpha' = (1 - \nu)\alpha$  and we recall that  $X_{ij}, \widetilde{X}_{ij}$  can only take value from  $\{\alpha, \alpha'\}$ . It thus follows from Lemma 8 that

$$D(Y'_{ij} | X_{ij} \parallel Y'_{ij} | \widetilde{X}_{ij}) \leq \frac{(g(\alpha) - g(\alpha'))^2}{g(\alpha')(1 - g(\alpha'))},$$

since  $\alpha' < \alpha$ . Now using the mean value theorem, we obtain

$$D \leq n(g'(\theta))^2 \frac{(\alpha - \alpha')^2}{g(\alpha')(1 - g(\alpha'))}, \quad \text{for some } \theta \in [\alpha', \alpha].$$

As we assumed that  $\nabla g(x)$  is decreasing in  $(0, +\infty)$ , we get

$$D \leq \frac{n(\nu\alpha)^2}{\rho_{\alpha'}} \leq \frac{64n\epsilon^2}{\rho_{\alpha'}}.$$

Due to the construction, the cardinality of  $\mathcal{X}$  equals to that of  $\mathcal{X}'_{\alpha/2, \nu}$ . Hence, combining (20) and (21), we can show

$$\frac{1}{4} \leq \frac{D+1}{\log |\mathcal{X}|} \leq \frac{16\nu^2}{rd_2} \left( \frac{64n\epsilon^2}{\rho_{\alpha'}^-} + 1 \right) \leq \frac{1024\epsilon^2}{\alpha^2 rd_2} \left( \frac{64n\epsilon^2}{\rho_{\alpha'}^-} + 1 \right). \quad (22)$$

Note that when  $64n\epsilon^2 \leq \rho_{\alpha'}^-$ , we have

$$\frac{1}{4} \leq 1024 \frac{2048\epsilon^2}{\alpha^2 rd_2},$$

implying  $\alpha^2 rd_2 \leq 8$  due to the definition of  $\epsilon$ . This contradicts our assumption that  $\alpha^2 rd_2 \geq C_0$  if we specify  $C_0 > 8$ .

When  $64n\epsilon^2 > \rho_{\alpha'}^-$ , then (22) suggests

$$\frac{1}{4} \leq \frac{1024 \times 128 \times n\epsilon^4}{\rho_{\alpha'}^- \alpha^2 rd_2},$$

which gives

$$\epsilon^2 > \frac{\alpha \sqrt{\rho_{\alpha'}^-}}{1024} \sqrt{\frac{rd_2}{n}}.$$

Picking  $C_2 = 1/1024$  in the definition of  $\epsilon$  and noting  $\rho_{\alpha'}^- \geq \rho_{0.75\alpha}^-$  yields a contradiction.

Therefore, (17) fails to hold with probability at least  $3/4$ .

□
